# Supplementary material for: Unrevealing the interaction between O2 molecules and poly(3-hexylthiophene-2,5-diyl) (P3HT)
Source: Royal Society of Chemistry journal article supplement (doi:10.1039/d2ra02969c), 2022-01-01
Supplement: d2ra02969c1.pdf [file d2ra02969c1.pdf]

## Unrevealing the interaction between O<sub>2</sub> molecules and Poly(3-hexylthiophene-2,5-diyl) (P3HT)

Marcelo Fernandes<sup>1†</sup>, Ernesto Osvaldo Wrasse<sup>1</sup>, Caio Junji Kawata Koyama<sup>1</sup>, Florian Steffen Günther<sup>2</sup>, Douglas José Coutinho<sup>1\*</sup>

<sup>1</sup>Federal University of Technology – Paraná (UTFPR), 85902-490 Toledo-PR, Brazil.

<sup>2</sup>São Carlos Institute of Physics, University of São Paulo, P.O.Box 369, 13560-970 São Carlos-SP, Brazil.

\*Corresponding author: douglascoutinho@utfpr.edu.br

Keywords: poly(3-hexyl)thiophene (P3HT), DFT, polymer oxidation and degradation, doping, singlet/triplet oxygen.

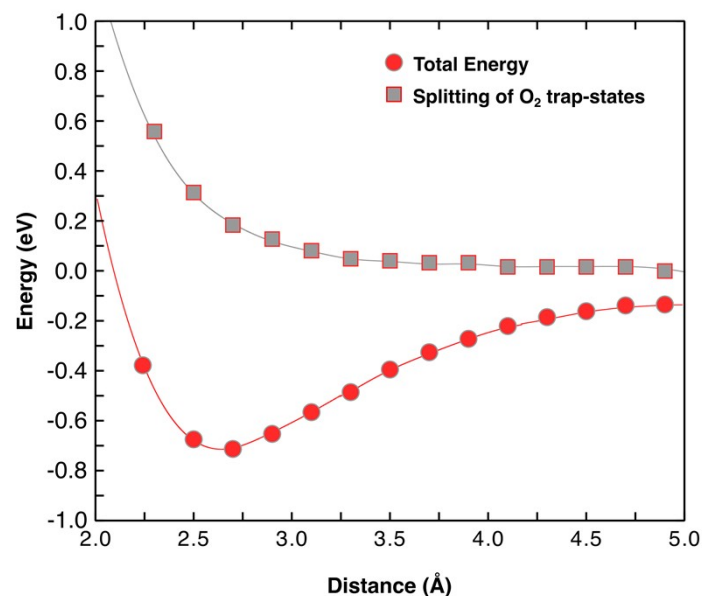

Fig. SM1 - Calculated energy as a function of the distance between a O<sub>2</sub> molecule and the thiophene ring. The red circles show the total energy, and the grey squares the split for the trap-state levels.

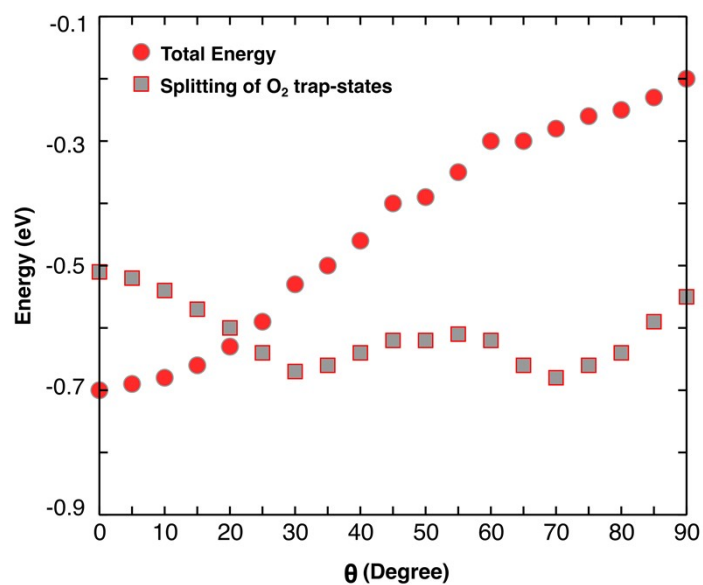

Fig. SM2 - Calculated energy for in-plane rotations of the O<sub>2</sub> molecule. The red circles show the total energy, and the grey squares the energy split for the O<sub>2</sub> trap-states.

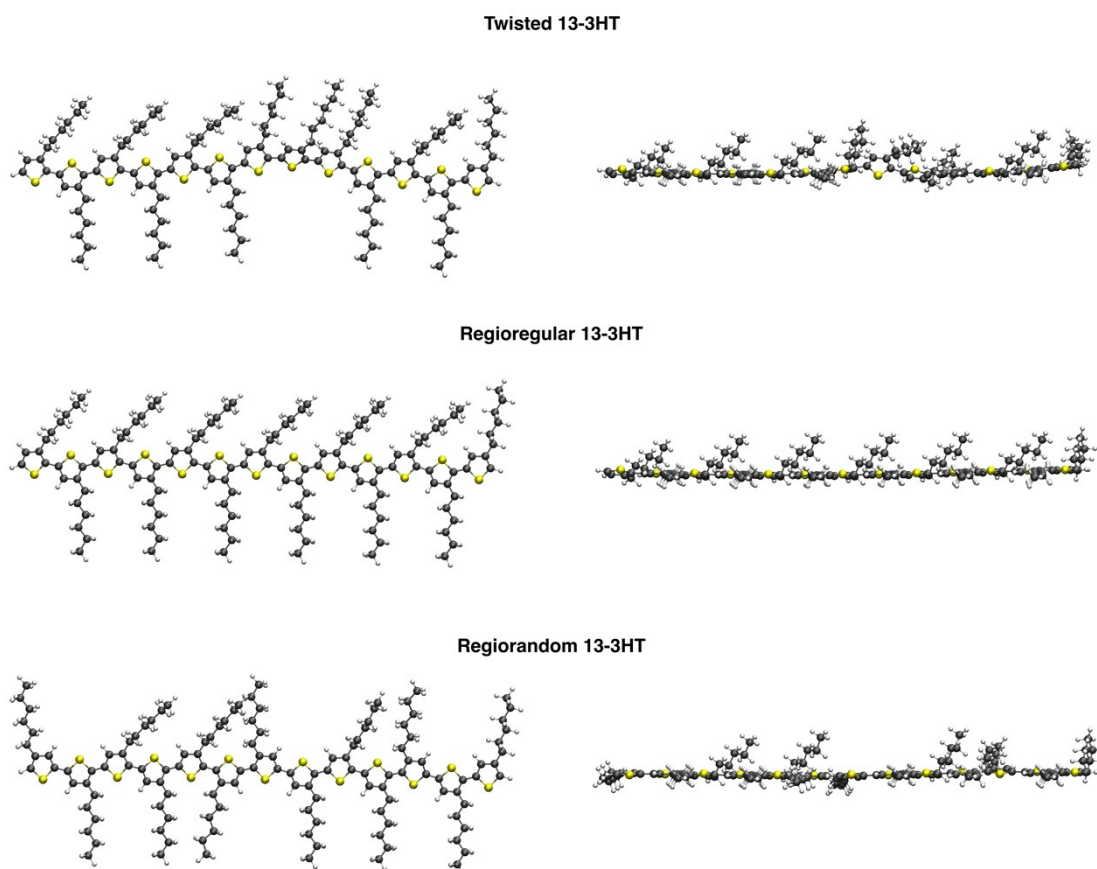

Fig. SM3 - Top and side view of the relaxed geometries of a twisted, regioregular (Rr) and regiorandom (Ra) 13-3HT oligomers.

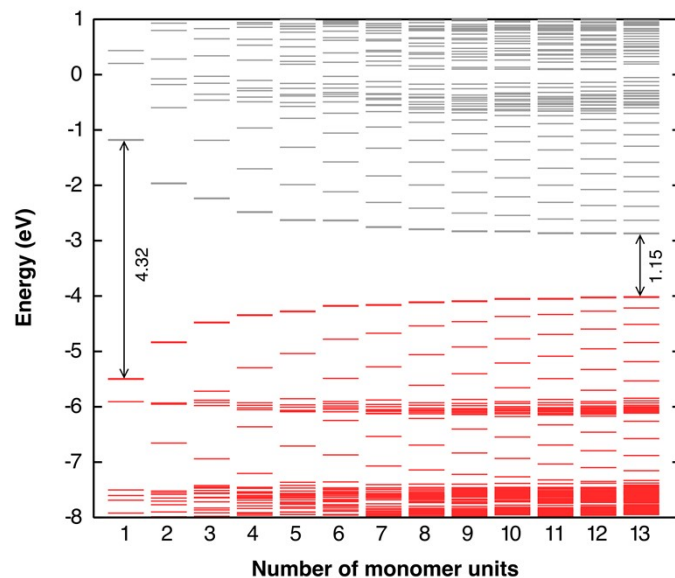

Fig. SM4 - Orbital energies as a function of the oligomer length  $N$ . Occupied levels are given in red and unoccupied levels in grey. The energy gaps for  $N = 1$  and  $N = 13$  are indicated.

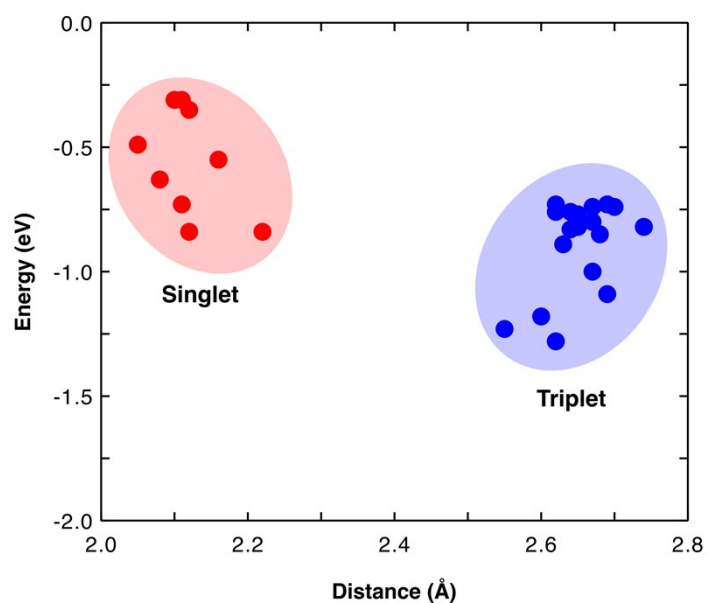

Fig. SM5 – Calculated interaction energy of P3HT: $O_2$  as a function of the distance  $d$  between the oxygen molecule and the thiophene ring for the models represented in Fig. SM3.

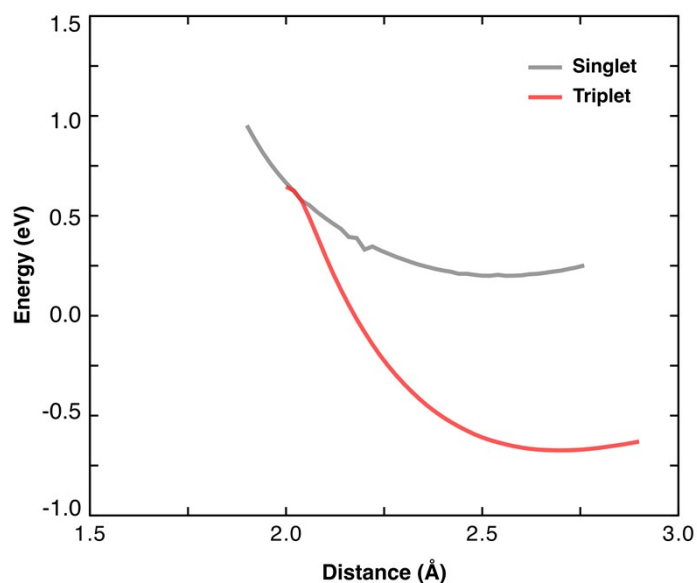

Fig. SM6 - Calculated energy for the O<sub>2</sub> molecule interacting with the P3HT monomer as a function of the distance *d* for the singlet (grey line) and triplet (red line) multiplicities.

*Atomic position of 3HT:O<sub>2</sub> model in Angstroms*

| <b>Atom</b> | <b>X</b>  | <b>Y</b>  | <b>Z</b> |
|-------------|-----------|-----------|----------|
| S           | 8.425196  | 7.021245  | 6.87264  |
| C           | 9.791333  | 9.078836  | 6.116628 |
| C           | 8.425672  | 9.348841  | 5.800664 |
| C           | 9.932485  | 7.839634  | 6.703298 |
| C           | 7.575829  | 8.322051  | 6.148169 |
| C           | 10.904524 | 10.058884 | 5.936687 |
| C           | 10.662383 | 11.350343 | 6.700593 |
| C           | 11.820002 | 12.320348 | 6.618687 |
| C           | 11.556975 | 13.6278   | 7.334615 |
| C           | 12.726302 | 14.589815 | 7.292128 |
| C           | 12.441503 | 15.898031 | 7.996521 |
| H           | 6.482498  | 8.265043  | 6.018051 |
| H           | 10.860485 | 7.371896  | 7.073661 |
| H           | 8.075223  | 10.288051 | 5.331095 |
| H           | 11.044487 | 10.292601 | 4.850111 |
| H           | 11.862594 | 9.594287  | 6.276658 |
| H           | 10.433307 | 11.110101 | 7.769831 |
| H           | 9.732082  | 11.839553 | 6.314089 |
| H           | 12.066165 | 12.525607 | 5.544616 |
| H           | 12.738324 | 11.840334 | 7.045111 |
| H           | 11.283453 | 13.420529 | 8.401452 |
| H           | 10.653829 | 14.120802 | 6.890377 |
| H           | 13.002904 | 14.78168  | 6.224565 |
| H           | 13.622012 | 14.096572 | 7.747385 |

|   |           |           |          |
|---|-----------|-----------|----------|
| H | 13.310695 | 16.593445 | 7.958918 |
| H | 12.190966 | 15.730499 | 9.070894 |
| H | 11.570593 | 16.421457 | 7.535393 |
| O | 8.433582  | 10.119957 | 8.486365 |
| O | 8.74854   | 9.045371  | 8.999731 |
